# Supplementary material for: Actinobacteria Isolated from an Underground Lake and Moonmilk Speleothem from the Biggest Conglomeratic Karstic Cave in Siberia as Sources of Novel Biologically Active Compounds
Source: PubMed Central journal article supplement (PMC4764329; doi:10.1371/journal.pone.0149216), 2016-02-22
Supplement: pone.0149216.s001.pdf [file pone.0149216.s001.pdf]

## SUPPORTING INFORMATION

# **Actinobacteria isolated from an underground lake and moonmilk speleothem from the biggest conglomeratic Karstic cave in Siberia as sources of novel biologically active compounds**

Denis V. Axenov-Gibanov<sup>1\*,&</sup>, Irina V. Voytsekhovskaya<sup>1,&</sup>, Bogdan T. Tokovenko<sup>2</sup>, Eugeny S. Protasov<sup>1</sup>, Stanislav V. Gamaiunov<sup>1</sup>, Yuriy V. Rebets<sup>2</sup>, Andriy N. Luzhetsky<sup>2,3</sup> and Maxim A. Timofeyev<sup>1</sup>

<sup>1</sup>Irkutsk State University, Institute of Biology, Irkutsk, Russia

<sup>2</sup>Helmholtz Institute for Pharmaceutical Research Saarland (HIPS), Saarbrücken, Germany

<sup>3</sup>Universität des Saarlandes – Pharmazeutische Biotechnologie, Saarbrücken, Germany

\* Corresponding author:

[Denis.axengri@gmail.com](mailto:Denis.axengri@gmail.com)

&These authors contributed equally to this work.

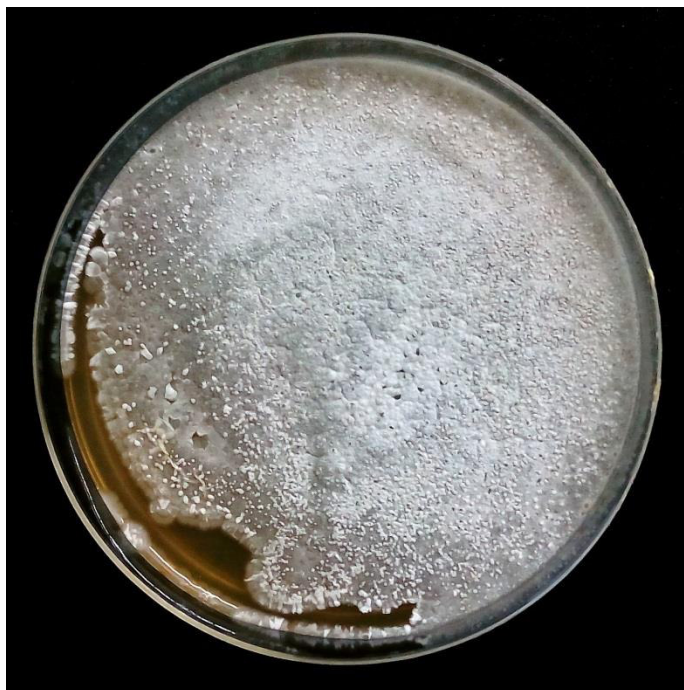

**S1 Fig. Photo of strain *Streptomyces sp. IB 2014/I/78-8*.**
