# Supplementary material for: Actinobacteria Isolated from an Underground Lake and Moonmilk Speleothem from the Biggest Conglomeratic Karstic Cave in Siberia as Sources of Novel Biologically Active Compounds
Source: PubMed Central journal article supplement (PMC4764329; doi:10.1371/journal.pone.0149216), 2016-02-22
Supplement: pone.0149216.s002.pdf [file pone.0149216.s002.pdf]

## SUPPORTING INFORMATION

# **Actinobacteria isolated from an underground lake and moonmilk speleothem from the biggest conglomeratic Karstic cave in Siberia as sources of novel biologically active compounds**

Denis V. Axenov-Gibanov<sup>1\*,&</sup>, Irina V. Voytsekhovskaya<sup>1,&</sup>, Bogdan T. Tokovenko<sup>2</sup>, Eugeny S. Protasov<sup>1</sup>, Stanislav V. Gamaiunov<sup>1</sup>, Yuriy V. Rebets<sup>2</sup>, Andriy N. Luzhetsky<sup>2,3</sup> and Maxim A. Timofeyev<sup>1</sup>

<sup>1</sup>Irkutsk State University, Institute of Biology, Irkutsk, Russia

<sup>2</sup>Helmholtz Institute for Pharmaceutical Research Saarland (HIPS), Saarbrücken, Germany

<sup>3</sup>Universität des Saarlandes – Pharmazeutische Biotechnologie, Saarbrücken, Germany

\* Corresponding author:

[Denis.axengri@gmail.com](mailto:Denis.axengri@gmail.com)

&These authors contributed equally to this work.

**S1 Table. The antimicrobial activity of biomass and culture fluid extracts of cultured actinobacteria strains grown in DNPM/ DNPM<sup>A</sup> media.**

| Strain                                    | DNPM/DNPM <sup>A</sup> media |                  |                |                      |                            |                    |                    |                  |                |                      |                            |                           |                        |                  |                |                      |                            |                    |
|-------------------------------------------|------------------------------|------------------|----------------|----------------------|----------------------------|--------------------|--------------------|------------------|----------------|----------------------|----------------------------|---------------------------|------------------------|------------------|----------------|----------------------|----------------------------|--------------------|
|                                           | Biomass extract*             |                  |                |                      |                            |                    | Cultural extract*  |                  |                |                      |                            |                           | Biomass-agar extract** |                  |                |                      |                            |                    |
|                                           | <i>B. subtilis</i>           | <i>P. putida</i> | <i>E. coli</i> | <i>S. cerevisiae</i> | <i>F. verticillioideus</i> | <i>C. albicans</i> | <i>B. subtilis</i> | <i>P. putida</i> | <i>E. coli</i> | <i>S. cerevisiae</i> | <i>F. verticillioideus</i> | <i>C. albicans</i>        | <i>B. subtilis</i>     | <i>P. putida</i> | <i>E. coli</i> | <i>S. cerevisiae</i> | <i>F. verticillioideus</i> | <i>C. albicans</i> |
| <i>Streptomyces sp. IB 2014 /I /78-8</i>  | -                            | -                | -              | -                    | -                          | -                  | +(16.3 ±1.5)       | +(16.0 ±2)       | +(15.3 ±1.5)   | -                    | -                          | +(10.3 ±0.6) <sup>×</sup> | -                      | -                | -              | -                    | -                          | -                  |
| <i>Streptomyces sp. IB 2014 /I /78-1</i>  | +(8.3±0.6) <sup>×</sup>      | -                | -              | -                    | -                          | -                  | -                  | -                | -              | -                    | -                          | -                         | -                      | -                | -              | -                    | -                          | -                  |
| <i>Nocardia sp. IB 2014 /I /100-5</i>     | -                            | -                | -              | -                    | -                          | -                  | -                  | -                | -              | -                    | -                          | -                         | -                      | -                | -              | -                    | -                          | -                  |
| <i>Nocardia sp. IB 2014 /I /79-1HS</i>    | -                            | -                | -              | -                    | -                          | -                  | -                  | -                | -              | -                    | -                          | -                         | -                      | -                | -              | -                    | -                          | -                  |
| <i>Streptomyces sp. IB 2014 /I /78-12</i> | -                            | -                | -              | -                    | -                          | -                  | -                  | -                | -              | -                    | -                          | -                         | -                      | -                | -              | -                    | -                          | -                  |
| <i>Streptomyces sp. IB 2014 /I /78-3</i>  | -                            | -                | -              | -                    | +(8.3±0.6)                 | -                  | +(12.3 ±0.6)       | -                | -              | -                    | +(10.3 ±0.6)               | -                         | +(6.3±0.6)             | -                | -              | +(5.6±0.6)           | +(9.3±0.6)                 | +(7.6±0.6)         |
| <i>Streptomyces sp. IB 2014 /I /78-6</i>  | -                            | -                | -              | -                    | -                          | -                  | -                  | -                | -              | -                    | -                          | -                         | +(13.0 ±2.0)           | -                | -              | -                    | -                          | -                  |
| <i>Nocardia sp. IB 2014 /I /100-1HS</i>   | -                            | -                | -              | -                    | -                          | -                  | -                  | -                | -              | -                    | -                          | -                         | -                      | -                | -              | -                    | -                          | -                  |
| <i>Streptomyces sp. IB 2014 /I /78-11</i> | -                            | -                | -              | -                    | -                          | -                  | -                  | -                | -              | -                    | -                          | -                         | -                      | -                | -              | -                    | -                          | -                  |
| <i>Streptomyces sp. IB 2014 /I /78-9</i>  | +(11.6 ±0.6)                 | -                | -              | -                    | +(7.6±0.6) <sup>×</sup>    | -                  | -                  | -                | -              | -                    | -                          | -                         | -                      | -                | -              | -                    | -                          | -                  |

\* Disc diameter-6mm; \*\* Disc diameter-4mm

× - Bacteriostatic activity

(Number) – The diameter of inhibition zone (in mm)
