# Supplementary material for: Actinobacteria Isolated from an Underground Lake and Moonmilk Speleothem from the Biggest Conglomeratic Karstic Cave in Siberia as Sources of Novel Biologically Active Compounds
Source: PubMed Central journal article supplement (PMC4764329; doi:10.1371/journal.pone.0149216), 2016-02-22
Supplement: pone.0149216.s003.pdf [file pone.0149216.s003.pdf]

## SUPPORTING INFORMATION

# **Actinobacteria isolated from an underground lake and moonmilk speleothem from the biggest conglomeratic Karstic cave in Siberia as sources of novel biologically active compounds**

Denis V. Axenov-Gibanov<sup>1\*,&</sup>, Irina V. Voytsekhovskaya<sup>1,&</sup>, Bogdan T. Tokovenko<sup>2</sup>, Eugeny S. Protasov<sup>1</sup>, Stanislav V. Gamaiunov<sup>1</sup>, Yuriy V. Rebets<sup>2</sup>, Andriy N. Luzhetsky<sup>2,3</sup> and Maxim A. Timofeyev<sup>1</sup>

<sup>1</sup>Irkutsk State University, Institute of Biology, Irkutsk, Russia

<sup>2</sup>Helmholtz Institute for Pharmaceutical Research Saarland (HIPS), Saarbrücken, Germany

<sup>3</sup>Universität des Saarlandes – Pharmazeutische Biotechnologie, Saarbrücken, Germany

\* Corresponding author:

[Denis.axengri@gmail.com](mailto:Denis.axengri@gmail.com)

&These authors contributed equally to this work.

**S2 Table. The antimicrobial activity of biomass and culture fluid extracts of cultured actinobacteria strains grown in NL-19/ MS media.**

| Strain                                       | NL-19/MS media     |                  |                              |                      |                            |                    |                    |                  |                |                      |                            |                    |                        |                  |                |                      |                            |                    |
|----------------------------------------------|--------------------|------------------|------------------------------|----------------------|----------------------------|--------------------|--------------------|------------------|----------------|----------------------|----------------------------|--------------------|------------------------|------------------|----------------|----------------------|----------------------------|--------------------|
|                                              | Biomass extract**  |                  |                              |                      |                            |                    | Cultural extract** |                  |                |                      |                            |                    | Biomass-agar extract** |                  |                |                      |                            |                    |
|                                              | <i>B. subtilis</i> | <i>P. putida</i> | <i>E. coli</i>               | <i>S. cerevisiae</i> | <i>F. verticillioideus</i> | <i>C. albicans</i> | <i>B. subtilis</i> | <i>P. putida</i> | <i>E. coli</i> | <i>S. cerevisiae</i> | <i>F. verticillioideus</i> | <i>C. albicans</i> | <i>B. subtilis</i>     | <i>P. putida</i> | <i>E. coli</i> | <i>S. cerevisiae</i> | <i>F. verticillioideus</i> | <i>C. albicans</i> |
| <i>Streptomyces sp. IB</i><br>2014 /I /78-8  | -                  | -                | -                            | -                    | -                          | -                  | -                  | -                | -              | -                    | -                          | -                  | -                      | -                | -              | -                    | -                          | -                  |
| <i>Streptomyces sp. IB</i><br>2014 /I /78-1  | +(11.3<br>±1.5)    | -                | -                            | -                    | -                          | -                  | -                  | -                | -              | -                    | -                          | -                  | -                      | -                | -              | -                    | -                          | -                  |
| <i>Nocardia sp. IB</i><br>2014 /I /100-5     | -                  | -                | -                            | -                    | -                          | -                  | -                  | -                | -              | -                    | -                          | -                  | -                      | -                | -              | -                    | -                          | -                  |
| <i>Nocardia sp. IB</i><br>2014 /I /79-1HS    | -                  | -                | -                            | -                    | -                          | -                  | -                  | -                | -              | -                    | -                          | -                  | -                      | -                | -              | -                    | -                          | -                  |
| <i>Streptomyces sp. IB</i><br>2014 /I /78-12 | -                  | -                | -                            | -                    | -                          | -                  | -                  | -                | -              | -                    | -                          | -                  | +(10.0<br>±2.0)        | -                | -              | -                    | -                          | -                  |
| <i>Streptomyces sp. IB</i><br>2014 /I /78-3  | +(5.3±<br>0.6)     | -                | -                            | -                    | +(9.6±<br>1.5)             | -                  | +(12.6<br>±2.5)    | -                | -              | -                    | -                          | -                  | +(6.3±<br>0.6)         | -                | -              | -                    | +(6.6±<br>1.5)             | -                  |
| <i>Streptomyces sp. IB</i><br>2014 /I /78-6  | +(5.6±<br>0.6)     | -                | +(14.6<br>±1.5) <sup>×</sup> | -                    | -                          | -                  | -                  | -                | -              | -                    | -                          | -                  | +(5.6±<br>0.6)         | -                | -              | -                    | -                          | -                  |
| <i>Nocardia sp. IB</i><br>2014 /I /100-1HS   | -                  | -                | -                            | -                    | -                          | -                  | -                  | -                | -              | -                    | -                          | -                  | -                      | -                | -              | -                    | -                          | -                  |
| <i>Streptomyces sp. IB</i><br>2014 /I /78-11 | -                  | -                | -                            | -                    | -                          | -                  | -                  | -                | -              | -                    | -                          | -                  | +(7.3±<br>2.5)         | -                | -              | -                    | -                          | -                  |
| <i>Streptomyces sp. IB</i><br>2014 /I /78-9  | +(12.0<br>±2.0)    | -                | -                            | -                    | -                          | -                  | -                  | -                | -              | -                    | -                          | -                  | -                      | -                | -              | -                    | -                          | -                  |

\*\* Disc diameter-4mm

× - Bacteriostatic activity

(Number) – The diameter of inhibition zone (in mm)
