# Supplementary material for: Actinobacteria Isolated from an Underground Lake and Moonmilk Speleothem from the Biggest Conglomeratic Karstic Cave in Siberia as Sources of Novel Biologically Active Compounds
Source: PubMed Central journal article supplement (PMC4764329; doi:10.1371/journal.pone.0149216), 2016-02-22
Supplement: pone.0149216.s004.pdf [file pone.0149216.s004.pdf]

## SUPPORTING INFORMATION

# **Actinobacteria isolated from an underground lake and moonmilk speleothem from the biggest conglomeratic Karstic cave in Siberia as sources of novel biologically active compounds**

Denis V. Axenov-Gibanov<sup>1\*,&</sup>, Irina V. Voytsekhovskaya<sup>1,&</sup>, Bogdan T. Tokovenko<sup>2</sup>, Eugeny S. Protasov<sup>1</sup>, Stanislav V. Gamaiunov<sup>1</sup>, Yuriy V. Rebets<sup>2</sup>, Andriy N. Luzhetsky<sup>2,3</sup> and Maxim A. Timofeyev<sup>1</sup>

<sup>1</sup>Irkutsk State University, Institute of Biology, Irkutsk, Russia

<sup>2</sup>Helmholtz Institute for Pharmaceutical Research Saarland (HIPS), Saarbrücken, Germany

<sup>3</sup>Universität des Saarlandes – Pharmazeutische Biotechnologie, Saarbrücken, Germany

\* Corresponding author:

[Denis.axengri@gmail.com](mailto:Denis.axengri@gmail.com)

&These authors contributed equally to this work.

**S3 Table. The antimicrobial activity of biomass and culture fluid extracts of cultured actinobacteria strains grown in NL-19/ MS media.**

| Test culture         | Fraction, Minute / Activity |                           |   |   |   |                           |   |   |   |    |                           |                    |    |    |                    |    |              |    |                    |                    |                    |                    |                            |
|----------------------|-----------------------------|---------------------------|---|---|---|---------------------------|---|---|---|----|---------------------------|--------------------|----|----|--------------------|----|--------------|----|--------------------|--------------------|--------------------|--------------------|----------------------------|
|                      | 1                           | 2                         | 3 | 4 | 5 | 6                         | 7 | 8 | 9 | 10 | 11                        | 12                 | 13 | 14 | 15                 | 16 | 17           | 18 | 19                 | 20                 | 21                 | 22                 | 23                         |
| <i>B. subtilis</i>   | -                           | +76±<br>2.0) <sup>×</sup> | - | - | - | +93±<br>1.5) <sup>×</sup> | - | - | - | -  | +60±<br>1.0) <sup>×</sup> | +113<br>±1.5)      | -  | -  | +61±<br>0.2)       | -  | +73±<br>1.5) | -  | -                  | -                  | -                  | -                  | -                          |
| <i>E. coli</i>       | -                           | -                         | - | - | - | -                         | - | - | - | -  | -                         | +117<br>±1.5)<br>× | -  | -  | +150<br>±1.5)<br>× | -  | -            | -  | -                  | -                  | -                  | -                  | -                          |
| <i>P. putida</i>     | -                           | +76±<br>0.6)              | - | - | - | +96±<br>1.5)              | - | - | - | -  | -                         | -                  | -  | -  | -                  | -  | -            | -  | -                  | -                  | -                  | -                  | -                          |
| <i>C. albicans</i>   | -                           | -                         | - | - | - | -                         | - | - | - | -  | -                         | -                  | -  | -  | -                  | -  | -            | -  | +146<br>±1.5)<br>× | +203<br>±2.5)<br>× | +146<br>±2.0)<br>× | +146<br>±3.7)<br>× | +153±2<br>.5) <sup>×</sup> |
| <i>S. cerevisiae</i> | -                           | -                         | - | - | - | -                         | - | - | - | -  | -                         | -                  | -  | -  | -                  | -  | -            | -  | -                  | -                  | -                  | -                  | -                          |

(Number) – The diameter of inhibition zone (in mm)

×-Bacteriostatic activity
